# Supplementary material for: Metal ion promoted tautomerization and C–N bond cleavage: conversion of catechol to a p-benzoquinone derivative
Source: Royal Society of Chemistry journal article supplement (doi:10.1039/c4cc05286b), 2014-01-01
Supplement: c4cc05286b1.pdf [file c4cc05286b1.pdf]

Electronic Supplementary Information (ESI)

## Metal ion promoted tautomerization and C-N bond cleavage: conversion of catechol to a *p*-benzoquinone derivative

Pinaki Saha,<sup>a</sup> Amit Saha Roy,<sup>a</sup> Thomas Weyhermüller<sup>b</sup> and Prasanta Ghosh<sup>\*,a</sup>

<sup>a</sup>Department of Chemistry, R. K. Mission Residential College, Narendrapur, Kolkata-103,  
India

<sup>b</sup>Max-Planck-Institut für Chemische Energiekonversion, Stiftstrasse 34-36 / D-45470  
Mülheim an der Ruhr, Germany

\*Correspondence to: ghosh@pghosh.in

### Table of Content

|                                                                                                                                                                                    | Page No. |
|------------------------------------------------------------------------------------------------------------------------------------------------------------------------------------|----------|
| Materials                                                                                                                                                                          | 2        |
| Syntheses                                                                                                                                                                          | 2        |
| Physical measurements                                                                                                                                                              | 4        |
| ESI (positive ion) mass spectrum of Q <sub><i>p</i>-OO</sub> in MeOH solvent                                                                                                       | 5        |
| X-ray crystallographic data collection and refinement of the structures                                                                                                            | 5        |
| Crystallographic data of Q <sub><i>p</i>-NO</sub> .MeCN, <b>1</b> .EtOH and <b>2</b>                                                                                               | 6        |
| Selected experimental and calculated bond lengths (Å) of Q <sub><i>p</i>-NO</sub>                                                                                                  | 7        |
| Selected experimental and calculated bond lengths (Å) and angles (deg) of <b>1</b> .EtOH and <b>1</b>                                                                              | 7        |
| Selected experimental and calculated bond lengths (Å) and angles (deg) of <b>2</b> and <b>2</b> <sup>Me</sup> (PMe <sub>3</sub> analogue of <b>2</b> )                             | 8        |
| Cyclic voltammograms of Q <sub><i>p</i>-NO</sub> and <b>1</b>                                                                                                                      | 8        |
| Density functional theory (DFT) calculations                                                                                                                                       | 9        |
| Gas phase optimized coordinates of Q <sub><i>p</i>-NO</sub>                                                                                                                        | 9        |
| Gas phase optimized coordinates of Q <sub><i>p</i>-NN</sub>                                                                                                                        | 10       |
| Gas phase optimized coordinates of Q <sub><i>o</i>-NO</sub>                                                                                                                        | 11       |
| Gas phase optimized coordinates of Q <sub><i>o</i>-NN</sub>                                                                                                                        | 11       |
| Gas phase optimized coordinates of <b>1</b>                                                                                                                                        | 12       |
| Gas phase optimized coordinates of <b>2</b> <sup>Me</sup> (PMe <sub>3</sub> analogue of <b>2</b> )                                                                                 | 13       |
| Gas phase optimized coordinates of (Q <sub><i>o</i>-NN</sub> )ZnCl <sub>2</sub>                                                                                                    | 14       |
| Gas phase optimized coordinates of [(Q <sub><i>o</i>-NO</sub> )ZnCl <sub>2</sub> ] <sup>-</sup>                                                                                    | 15       |
| Excitation energies (λ/nm), oscillator strengths (f) and dominant contributions of UV-Vis/NIR absorption bands of Q <sub><i>p</i>-NO</sub> obtained from the TD DFT calculations   | 16       |
| Photo active molecular orbitals of Q <sub><i>p</i>-NO</sub>                                                                                                                        | 16       |
| Excitation energies (λ/nm), oscillator strengths (f), transition types and dominant contributions of UV-Vis/NIR absorption bands of <b>1</b> obtained from the TD DFT calculations | 17       |
| Photo active molecular orbitals of <b>1</b>                                                                                                                                        | 17       |
| References                                                                                                                                                                         | 19       |

## Materials

Reagents or analytical grade materials were obtained from the commercial suppliers and used without further purification. Spectroscopic grade solvents were used for spectroscopic and electrochemical measurements.

## Experimental section

### Syntheses

#### 2,5-bis(*p*-tolylamino)-4-*p*-tolyliminobenzoquinone ( $Q_{p-NO}$ )

To a solution of catechol (110 mg, 1 mmol) in MeOH (25 ml), *p*-toluidine (321 mg, 3 mmol) and catalytic amount of iodine were added and the resulting solution was heated to reflux for 90 min. The reaction mixture was cooled at 25°C and allowed to evaporate slowly in air. After 2-3 days, dark red crystals of  $Q_{p-NO} \cdot MeCN$  separated out, which were filtered and collected. Yield: 281 mg, 69% (with respect to catechol). ESI (positive ion)- MS in  $CH_3OH$ ;  $m/z$ : 408.05 ( $Q_{p-NO}^+$ ).  $^1H$  NMR ( $CDCl_3$ , 300 MHz, 300K):  $\delta$  (ppm) = 8.64 (s, NH), 7.60 (s, NH), 7.21 (m, 3H), 7.08 (d,  $J=8.1$ , 3H), 6.96 (d,  $J=8.1$ , 3H), 6.87 (d,  $J=7.8$  Hz, 3H), 6.19 (s, 1H), 6.09 (s, 1H), 2.36 (s, 6H), 2.29 (s, 3H).  $^{13}C$  NMR ( $CDCl_3$ , 300 MHz, 300 K):  $\delta$  (ppm) = 180.00 (-C=O), 150.01 (-C-NH-), 135.63, 135.16, 130.10, 130.05, 129.71, 123.45, 121.81, 121.13, 96.87, 89.89, 21.04 (-CH<sub>3</sub>), 20.90 (-CH<sub>3</sub>). Anal. Calcd. for  $C_{27}H_{25}N_3O$  ( $Q_{p-NO}$ ): C, 79.58; H, 6.18; N, 10.31. Found: C, 79.31; H, 6.02; N, 10.09. IR (KBr,  $\nu_{max}/cm^{-1}$ ): 3313 (s, N-H), 3282 (s, N-H), 1587 (vs, CPh=N-), 1517 (vs), 1482 (s), 1343 (s), 1296 (s), 1175 (w), 820 (s), 628 (w), 506 (w).

#### $[Pd^{II}(Q_{o-NN})Cl_2] \cdot EtOH$ (**1.EtOH**)

$PdCl_2$  (177 mg, 1 mmol) was digested to  $H_2[PdCl_4]$  using few drops of concentrated HCl and to it EtOH (30 ml) and MeCN (30 ml) solvents were added and heated. To this hot solution mixture  $Q_{p-NO}$  (408 mg, 1 mmol) was added and the mixture was heated to reflux for 45 min. The solutions turned dark green, which was cooled to room temperature. After 3-4 days crystalline green compound of **1.EtOH** separated out which was filtered and the residue was dried in air. The single crystals for X-ray diffraction study were collected from this residue. The residue was dried under high vacuum for analytical measurements. Yield: 380 mg, 74% (with respect to palladium). ESI (positive ion)-MS in  $CH_3OH$ ;  $m/z$ : 549.91 (**1-Cl**).  $^1HNMR$  ( $CDCl_3$ , 300 MHz, 300K):  $\delta$  (ppm) = 9.50 (s, OH), 8.11 (s, NH), 7.09 (d, 3H), 6.97 (m, 9H), 5.55 (s, 1H), 5.42 (s, 1H), 3.45 (q,  $J=5.1$ , 3H), 2.49 (s, 3H), 2.32 (s, 3H), 2.23 (s, 3H), 1.05 (t,  $J=5.4$ , 3H).  $^{13}C$  NMR ( $CDCl_3$ , 300 MHz, 300 K):  $\delta$  (ppm) = 169.00 (C-OH), 146.71 (-C-NH-), 143.85 (-C=N-), 143.61 (-C=N-), 130.18, 129.78, 129.07, 128.72, 125.22, 124.71, 123.88, 97.79, 90.18, 56.67 (EtOH), 21.22 (-CH<sub>3</sub>), 20.03 (-CH<sub>3</sub>), 18.85 (EtOH). Anal. Calcd. for

$C_{27}H_{25}N_3OPdCl_2$  (**1**): C, 55.43; H, 4.31; N, 7.19. Found: C, 55.24; H, 4.11; N, 7.02. IR (KBr,  $\nu_{max}/cm^{-1}$ ): 3434 (w, -OH), 3244 (vs, N-H), 2913 (s), 1586 (s, PhC=N-), 1557 (vs), 1502 (s), 1419 (vs), 1274 (vs), 1054 (w), 813 (s), 679 (w), 497 (w).

### **[Rh<sup>III</sup>(PPh<sub>3</sub>)(*p*-toluidine)(MeCN)Cl<sub>3</sub>] (**2**)**

To a hot solution of  $Q_{p-NO}$  (204 mg, 0.5 mmol) in a mixture of EtOH (30 mL) and MeCN (30 mL) solvents, anhydrous RhCl<sub>3</sub> (105 mg, 0.5 mmol) and PPh<sub>3</sub> (131 mg, 0.5 mmol) were added. The mixture was refluxed for 45 min in argon atmosphere and allowed to cool at room temperature (298 K). Yellowish-orange crystal of **2** separated out. The mixture was filtered and the residue was dried in air. Yield: 261 mg, 54% (with respect to rhodium). ESI (positive ion)- MS in MeCN;  $m/z$ : 618 (**2**<sup>+</sup>)(-Cl<sup>-</sup>). <sup>1</sup>H NMR (CDCl<sub>3</sub>, 300 MHz, 300K):  $\delta$  (ppm) = 8.91(s, 2H), 7.83 (d, 2H), 7.81(d, 2H), 7.42 (t, 6H), 7.31 (d, 2H), 7.29 (d, 2H), 7.28 (d, 2H), 7.12 (t, 3H), 2.35 (t, 3H), 1.59 (t, 3H). <sup>13</sup>C NMR (CDCl<sub>3</sub>, 300 MHz, 300 K):  $\delta$  (ppm) = 135.87, 135.79, 135.59, 134.82, 132.51, 132.00, 131.90, 130.11, 129.73, 129.48, 129.28, 129.21, 128.76, 127.83, 127.73, 123.89, 118.51, 114.51 (MeCN), 20.11 (-CH<sub>3</sub>), 1.62 (MeCN). Anal. Calcd. for  $C_{27}H_{27}N_2PRhCl_3$  (**2**): C, 52.33; H, 4.39; N, 4.52; Found: C, 52.24; H, 4.31; N, 4.41; IR (KBr,  $\nu_{max}/cm^{-1}$ ): 3255 (s, N-H), 3210 (w), 3131 (s, N-H)), 3058 (w), 2918(s), 2324 (vw), 1583 (w), 1513 (vs), 1482 (vs), 1426 (vs), 1384 (s), 1099 (vs), 816(w), 744(vs), 693(vs,  $\nu_{Ru-P(sym)}$ ), 525(vs,  $\nu_{Ru-P(asym)}$ ), 511 (vs).

### **Direct synthesis of 2 with *p*-toluidine**

To a hot mixture of EtOH (20 mL) and MeCN (20 mL) solvents, anhydrous RhCl<sub>3</sub> (75 mg, 0.36 mmol), PPh<sub>3</sub> (93.5 mg, 0.36 mmol) and *p*-toluidine (39 mg, 0.36 mmol) were added successively. The mixture was refluxed for 45 min under argon and allowed to cool at room temperature (298 K). Yellowish-orange micro crystalline of **2** separated out. The mixture was filtered and the residue was dried in air. Yield: 136 mg, 61% (with respect to rhodium). ESI (positive ion)- MS peak in MeCN, IR and the <sup>1</sup>H NMR data in CDCl<sub>3</sub> are similar to above.

### **2,5-bis(*p*-tolylamino)-*p*-benzoquinone ( $Q_{p-OO}$ )**

The filtrate after separation of complex **2** obtained from the above reaction was collected and evaporated to dryness. The organic mass was extracted with diethyl ether. Column chromatography in basic alumina of this diethyl ether solution was performed. Elution with 1:1 ether and CH<sub>2</sub>Cl<sub>2</sub> solvents mixture and evaporation in high vacuum yield the residue of  $Q_{p-OO}$  product which was dried.

Yield: 55 mg, ~35% (with respect to  $Q_{p-NO}$ ). ESI (positive ion)- MS in MeOH;  $m/z$ : 317.96, 316.95 ( $Q_{p-OO}^+$ ).  $^1H$  NMR ( $CDCl_3$ , 300 MHz, 300K):  $\delta$  (ppm) = 8.64 (s, NH), 7.69 (s, NH), 7.18 (d,  $J$ = 8.7 Hz, 2H), 7.08 (d,  $J$ = 8.1 Hz, 2H), 6.97 (d,  $J$ = 8.1 Hz, 2H), 6.87 (d,  $J$ =8.1 Hz, 2H), 6.20 (s, 1H), 6.09 (s, 1H), 2.36 (s, 3H), 2.29 (s, 3H).  $^{13}C$  NMR ( $CDCl_3$ , 300 MHz, 300 K):  $\delta$  (ppm) = 180.93 (-C=O), 153.45(-C-NH), 140.81, 130.01, 129.87, 129.51, 123.11, 121.09, 120.78, 96.64, 90.06, 23.74 (- $CH_3$ ), 22.93 (- $CH_3$ ). Anal. Calcd. For  $C_{20}H_{18}N_2O_2$  ( $Q_{p-OO}$ ): C, 75.45; H, 5.70; N, 8.80; found: C, 75.39; H, 5.64; N, 8.74; IR (KBr,  $\nu_{max}/cm^{-1}$ ): 3252 (s, -NH), 3028 (w), 2922 (s), 1726 (s), 1634 (s), 1579 (vs), 1516 (vs), 1342 (w), 1294 (vs), 1177 (s), 1073 (w), 809(s).

### Physical measurements

Commercially available spectroscopic grade solvents were used for spectroscopic and electrochemical measurements. The carbon and hydrogen contents of the compounds were obtained from a *Perkin-Elmer 2400 series II* elemental analyzer. IR spectra of the samples were measured from 4000 to 400  $cm^{-1}$  with KBr pellets at room temperature on a *Perkin-Elmer Spectrum RXI* Fourier transform IR spectrophotometer.  $^1H$  NMR and  $^{13}C$  NMR spectra in  $CDCl_3$  and DMSO solvent were carried out on a *Bruker Avance DPX-300 MHz* spectrometer. ESI mass spectra were recorded on a *micromass Q-TOF* mass spectrometer. Electronic absorption spectra in solution at 298 K were recorded on a *Perkin-Elmer Lambda 25* spectrophotometer in the range of 1100-200 nm. The electroanalytical instrument *BASi Epsilon-EC* for cyclic voltammetry experiments in DMSO and MeCN solution containing 0.20 M tetrabutylammonium hexafluorophosphate as the supporting electrolyte was used. The BASi platinum working electrode, platinum auxiliary electrode and Ag/AgCl reference electrode were used for the measurements. The redox potential data are referenced versus a ferrocenium/ferrocene,  $Fc^+/Fc$ , couple. EPR spectra were recorded on *Magnetech GmbH MiniScope MS400* EPR spectrometer (equipped with temperature controller TC H03), where the microwave frequency was measured with a frequency counter FC400.

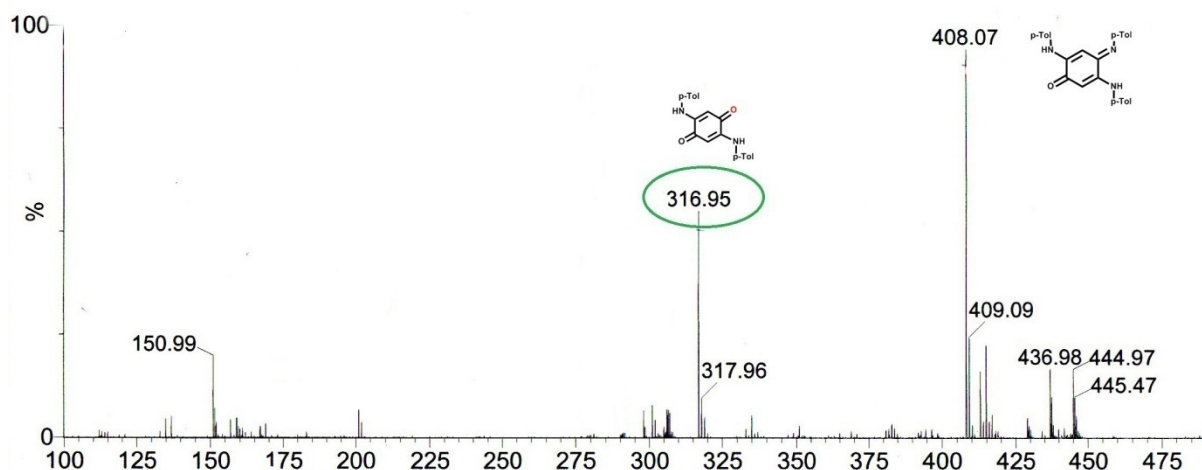

**Fig. S1.** ESI (positive ion) mass spectrum of  $Q_{p-OO}$  in MeOH solvent.

### X-ray crystallographic data collection and refinement of the structures

Single crystals of  $Q_{p-NO}$ .MeCN, **1**.EtOH and **2** were picked up with a nylon loop, which were mounted on a Bruker Kappa CCD diffractometer equipped with a molybdenum target rotating-anode X-ray source and a graphite monochromator (Mo  $K\alpha$ ,  $\lambda = 0.71073 \text{ \AA}$ ). Final cell constants were obtained from least-squares fits of all measured reflections. Structures were readily solved by the Patterson method and subsequent difference Fourier techniques. SHELXS-97<sup>1</sup> and SHELXL-97<sup>2</sup> were used for the structure solution and refinement. All non-hydrogen atoms were refined anisotropically. Hydrogen atoms were placed at calculated positions and refined as riding atoms with isotropic displacement parameters.

**Table S1** Crystallographic data of  $Q_{p-NO}$ .MeCN, 1.EtOH and 2

| Formula                                                                                                                                                                                                                                                                                                    | $C_{27}H_{25}N_3O.MeCN$ | $C_{27}H_{25}Cl_2N_3OPd.C_2H_6O$ | $C_{27}H_{27}N_2PRhCl_3$ |
|------------------------------------------------------------------------------------------------------------------------------------------------------------------------------------------------------------------------------------------------------------------------------------------------------------|-------------------------|----------------------------------|--------------------------|
| CCDC Number                                                                                                                                                                                                                                                                                                | 979387                  | 979388                           | 979389                   |
| Fw                                                                                                                                                                                                                                                                                                         | 448.55                  | 630.87                           | 619.74                   |
| crystal colour                                                                                                                                                                                                                                                                                             | dark red                | dark green                       | yellowish brown          |
| crystal system                                                                                                                                                                                                                                                                                             | triclinic               | triclinic                        | monoclinic               |
| space group                                                                                                                                                                                                                                                                                                | <i>P</i> -1             | <i>P</i> -1                      | <i>P</i> 2(1)/ <i>c</i>  |
| a, Å                                                                                                                                                                                                                                                                                                       | 9.4903(8)               | 10.792(2)                        | 15.9397(5)               |
| b, Å                                                                                                                                                                                                                                                                                                       | 10.9524(10)             | 11.159(2)                        | 9.5342(3)                |
| c, Å                                                                                                                                                                                                                                                                                                       | 13.6734(12)             | 12.170(2)                        | 19.3761(6)               |
| $\alpha^\circ$                                                                                                                                                                                                                                                                                             | 70.137(5)               | 100.53(2)                        | 90.00                    |
| $\beta^\circ$                                                                                                                                                                                                                                                                                              | 70.544(5)               | 90.62(2)                         | 113.7200(10)             |
| $\gamma^\circ$                                                                                                                                                                                                                                                                                             | 77.237(4)               | 104.71(2)                        | 90.00                    |
| V, Å <sup>3</sup>                                                                                                                                                                                                                                                                                          | 1251.02(19)             | 1391.2(4)                        | 2695.87(15)              |
| Z                                                                                                                                                                                                                                                                                                          | 2                       | 2                                | 4                        |
| T, K                                                                                                                                                                                                                                                                                                       | 296(2)                  | 100(2)                           | 293(2)                   |
| calcd, g cm <sup>-3</sup>                                                                                                                                                                                                                                                                                  | 1.191                   | 1.506                            | 1.527                    |
| unique reflections                                                                                                                                                                                                                                                                                         | 4296                    | 9549                             | 3730                     |
| refection ( $I > 2\sigma(I)$ )                                                                                                                                                                                                                                                                             | 3107                    | 8583                             | 3097                     |
| $\lambda$ , Å / $\mu$ , mm <sup>-1</sup>                                                                                                                                                                                                                                                                   | 0.71073/0.074           | 0.71073/0.890                    | 0.71073/1.009            |
| F(000)                                                                                                                                                                                                                                                                                                     | 476                     | 644                              | 1256                     |
| R1 <sup>a</sup> [ $I > 2\sigma(I)$ ]/GoF <sup>b</sup>                                                                                                                                                                                                                                                      | 0.0507 / 0.849          | 0.0494 / 1.058                   | 0.0399 / 1.035           |
| R1 <sup>a</sup> (all data)                                                                                                                                                                                                                                                                                 | 0.0685                  | 0.0547                           | 0.0484                   |
| wR2 <sup>c</sup> ( $I > 2\sigma(I)$ )                                                                                                                                                                                                                                                                      | 0.1826                  | 0.1257                           | 0.1263                   |
| No. of parameters / restr.                                                                                                                                                                                                                                                                                 | 319 / 0                 | 347 / 3                          | 312/1                    |
| residual density, eÅ <sup>-3</sup>                                                                                                                                                                                                                                                                         | 0.224                   | 2.253                            | 1.012                    |
| Observation criterion: <sup>a</sup> R1 = $\sum  F_o  -  F_c   / \sum F_o $ . <sup>b</sup> Goof = $\{\sum[w(F_o^2 - F_c^2)^2] / (n-p)\}^{1/2}$ ,<br><sup>c</sup> wR2 = $[\sum[w(F_o^2 - F_c^2)^2] / \sum[w(F_o^2)^2]]^{1/2}$ where $w = 1 / [\sigma^2(F_o^2) + (aP)^2 + bP]$ , $P = (F_o^2 + 2F_c^2) / 3$ . |                         |                                  |                          |

**Table S2** Selected experimental and calculated bond lengths (Å) of Q<sub>p-NO</sub>-MeCN and Q<sub>p-NO</sub>

|            | Bond lengths (Å) |            |
|------------|------------------|------------|
|            | experimental     | calculated |
| C(2)-N(1)  | 1.336(2)         | 1.362      |
| C(7)-N(8)  | 1.287(2)         | 1.301      |
| C(9)-N(8)  | 1.413(2)         | 1.399      |
| C(15)-N(1) | 1.411(2)         | 1.404      |
| C(5)-N(21) | 1.346(2)         | 1.373      |
| C(4)-O(29) | 1.236(2)         | 1.232      |
| C(2)-C(7)  | 1.499 (2)        | 1.505      |
| C(2)-C(3)  | 1.364(2)         | 1.369      |
| C(3)-C(4)  | 1.408(2)         | 1.446      |
| C(4)-C(5)  | 1.499(2)         | 1.517      |
| C(5)-C(6)  | 1.348(2)         | 1.369      |
| C(6)-C(7)  | 1.419(2)         | 1.439      |

**Table S3** Selected experimental and calculated bond lengths (Å) and angles (deg) of 1.EtOH and 1

|                   | Bond parameters (Å)   |                |
|-------------------|-----------------------|----------------|
|                   | experimental (1.EtOH) | calculated (1) |
| Pd(1)-N(1)        | 2.010(18)             | 2.081          |
| Pd(1)-N(8)        | 2.017(19)             | 2.079          |
| Pd(1)-Cl(1)       | 2.278(7)              | 2.321          |
| Pd(1)-Cl(2)       | 2.286(1)              | 2.325          |
| C(2)-N(1)         | 1.309(3)              | 1.315          |
| C(7)-N(8)         | 1.322(2)              | 1.322          |
| C(5)-N(21)        | 1.350(3)              | 1.369          |
| C(4)-O(29)        | 1.321(2)              | 1.363          |
| C(2)-C(7)         | 1.481(3)              | 1.482          |
| C(2)-C(3)         | 1.431(3)              | 1.441          |
| C(3)-C(4)         | 1.364(3)              | 1.358          |
| C(4)-C(5)         | 1.479(3)              | 1.469          |
| C(5)-C(6)         | 1.374(3)              | 1.377          |
| C(6)-C(7)         | 1.409(3)              | 1.431          |
| C(9)-N(8)         | 1.430(3)              | 1.424          |
| C(15)-N(1)        | 1.433(3)              | 1.424          |
| N(1)-Pd(1)-N(8)   | 80.49(8)              | 78.81          |
| N(1)-Pd(1)-Cl(2)  | 95.85(6)              | 95.62          |
| N(8)-Pd(1)-Cl(1)  | 94.01(5)              | 95.56          |
| Cl(1)-Pd(1)-Cl(2) | 89.69(3)              | 90.00          |

**Table S4** Selected experimental and calculated bond lengths (Å) and angles (deg) of **2** and **2<sup>Me</sup>** (PMe<sub>3</sub> analogue of **2**)

|                | Bond parameters (Å) |            |
|----------------|---------------------|------------|
|                | experimental        | calculated |
| Rh-N(10)       | 2.017(4)            | 2.041      |
| Rh-N(20)       | 2.162(4)            | 2.230      |
| Rh-Cl(1)       | 2.3973(12)          | 2.421      |
| Rh-Cl(2)       | 2.3141(11)          | 2.371      |
| Rh-Cl(3)       | 2.3710(11)          | 2.419      |
| Rh-P(30)       | 2.3070(13)          | 2.337      |
| Cl(2)-Rh-Cl(1) | 94.15(4)            | 91.95      |
| Cl(3)-Rh-Cl(1) | 170.70(4)           | 174.05     |
| N(10)-Rh-Cl(1) | 85.75(10)           | 88.00      |
| N(10)-Rh-N(20) | 90.09(18)           | 92.41      |
| N(10)-Rh-P(30) | 96.54(14)           | 96.16      |
| N(10)-Rh-Cl(3) | 86.08(11)           | 87.94      |

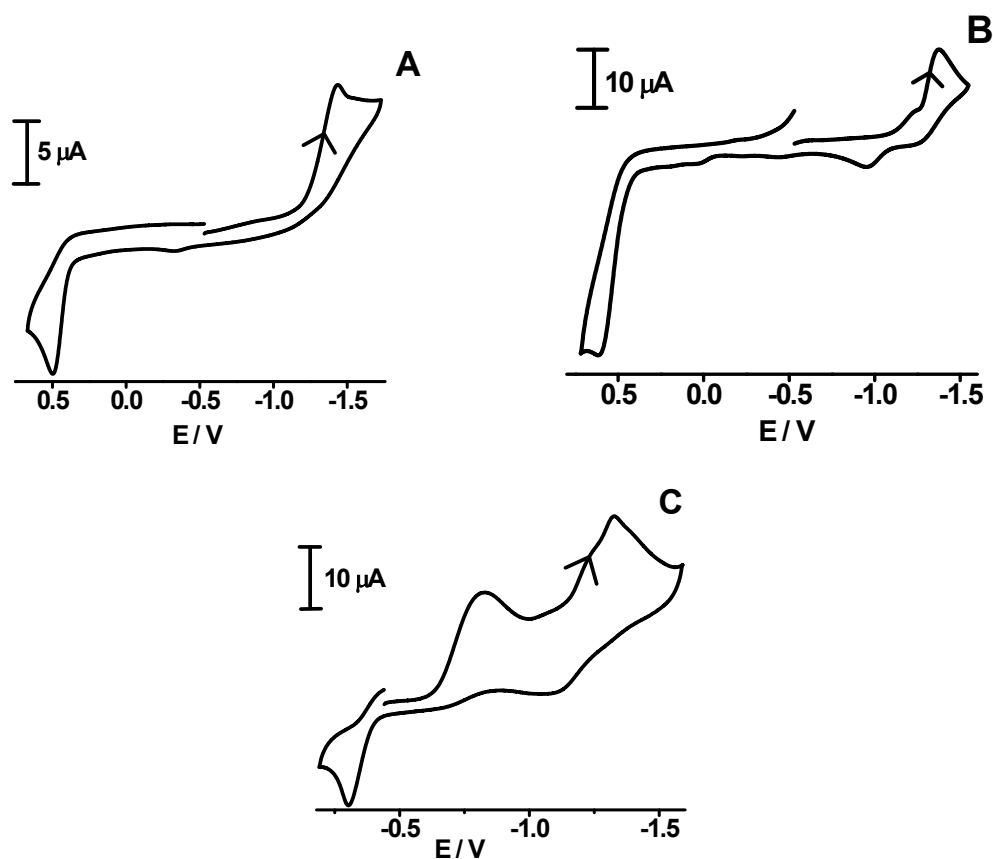

**Fig. S2** Cyclic voltammograms of (A)  $Q_{p-NO}$  in  $CH_3CN$ , (B)  $Q_{p-NO}$  in  $DMSO$  and (C) **1** in  $DMF$  using 0.20 M  $[N(n-Bu)_4]PF_6$  at 298 K.



## Density functional theory (DFT) calculations

All calculations reported in this article were done with the Gaussian 03W<sup>3</sup> program package supported by GaussView 4.1. The DFT<sup>4</sup> and TD DFT<sup>5</sup> calculations were performed at the level of Becke three parameter hybrid functional with the non-local correlation functional of Lee-Yang-Parr (B3LYP)<sup>6</sup>.

Gas-phase geometries  $Q_{p-NO}$ ,  $Q_{o-NN}$ ,  $Q_{p-NN}$ ,  $Q_{o-NO}$ , **1**, **2<sup>Me</sup>** (PMe<sub>3</sub> analogue of **2**),  $[(Q_{p-NO})ZnCl_2]^-$  and  $(Q_{o-NN})ZnCl_2$  with singlet spin state were optimized using Pualy's Direct Inversion<sup>7</sup> in the Iterative Subspace (DIIS), 'tight' convergent SCF procedure<sup>8</sup> ignoring symmetry with the converging criteria. In all calculation, a LANL2DZ basis set along with the corresponding effective core potential (ECP) was used for palladium and zinc metals<sup>9-11</sup>. Valence double zeta basis set, 6-31G<sup>12</sup> for H was used. For C, O, N and Cl non-hydrogen atoms valence double zeta plus diffuse and polarization functions, 6-31++G\*\*<sup>13</sup> as basis set were employed for the calculations. The sixty lowest singlet excitation energies on the optimized geometries of  $Q_{p-NO}$  and **1** were calculated by the TD DFT method.

**Table S5** Gas phase optimized coordinates of  $Q_{p-NO}$  at the B3LYP level of the theory

| Sl | Sym | X        | Y        | Z        | Sl | Sym | X        | Y        | Z        |
|----|-----|----------|----------|----------|----|-----|----------|----------|----------|
| 1  | C   | -0.97412 | -1.42751 | -0.58496 | 29 | H   | -0.74989 | 5.386646 | 1.997935 |
| 2  | C   | 0.432076 | -1.56872 | -0.28019 | 30 | H   | 2.348605 | 6.209089 | -0.85888 |
| 3  | C   | 1.251828 | -0.5019  | -0.0295  | 31 | C   | 3.464379 | -1.61389 | 0.428245 |
| 4  | C   | 0.68671  | 0.892552 | -0.05088 | 32 | C   | 3.073988 | -2.83444 | 1.000141 |
| 5  | C   | -0.72119 | 1.040349 | -0.31071 | 33 | C   | 4.816619 | -1.43067 | 0.093957 |
| 6  | C   | -1.55066 | -0.02474 | -0.53861 | 34 | C   | 4.014334 | -3.84443 | 1.198305 |
| 7  | H   | 0.809464 | -2.58132 | -0.33267 | 35 | H   | 2.051562 | -2.98269 | 1.325406 |
| 8  | H   | -1.1188  | 2.050118 | -0.34475 | 36 | C   | 5.74305  | -2.44559 | 0.308477 |
| 9  | O   | -1.67514 | -2.38331 | -0.92003 | 37 | H   | 5.134429 | -0.48611 | -0.34117 |
| 10 | C   | -4.01453 | -0.61874 | -0.71677 | 38 | C   | 5.361237 | -3.67987 | 0.853279 |
| 11 | C   | -5.09891 | -0.39531 | -1.57264 | 39 | H   | 3.689142 | -4.78054 | 1.64677  |
| 12 | C   | -4.15439 | -1.54486 | 0.326254 | 40 | H   | 6.783689 | -2.2766  | 0.040809 |
| 13 | C   | -6.29332 | -1.09404 | -1.39896 | 41 | N   | 1.550795 | 1.843954 | 0.149208 |
| 14 | H   | -5.0017  | 0.321884 | -2.38457 | 42 | N   | 2.587792 | -0.53443 | 0.232069 |
| 15 | C   | -5.34514 | -2.24577 | 0.476784 | 43 | H   | -3.06963 | 1.144699 | -1.13796 |
| 16 | H   | -3.33493 | -1.71503 | 1.014255 | 44 | C   | -7.71911 | -2.82239 | -0.20445 |
| 17 | C   | -6.43895 | -2.03931 | -0.37883 | 45 | H   | -8.04205 | -2.8384  | 0.843511 |
| 18 | H   | -7.12176 | -0.90312 | -2.0772  | 46 | H   | -8.53322 | -2.39582 | -0.79957 |
| 19 | H   | -5.43187 | -2.96357 | 1.289623 | 47 | H   | -7.59525 | -3.86755 | -0.51783 |
| 20 | N   | -2.86078 | 0.18491  | -0.89092 | 48 | C   | 0.529602 | 7.468013 | 0.753613 |
| 21 | C   | 1.222625 | 3.197678 | 0.280039 | 49 | H   | 1.298489 | 7.920829 | 1.39423  |
| 22 | C   | 0.23219  | 3.674096 | 1.159028 | 50 | H   | 0.56269  | 7.99413  | -0.20755 |

|    |   |          |          |          |    |   |          |          |          |
|----|---|----------|----------|----------|----|---|----------|----------|----------|
| 23 | C | 1.995722 | 4.140898 | -0.42262 | 51 | H | -0.44176 | 7.672448 | 1.215846 |
| 24 | C | 0.014687 | 5.043695 | 1.303989 | 52 | C | 6.36219  | -4.79534 | 1.042719 |
| 25 | H | -0.34153 | 2.967279 | 1.751017 | 53 | H | 7.361395 | -4.4047  | 1.26478  |
| 26 | C | 1.750097 | 5.502546 | -0.2875  | 54 | H | 6.070288 | -5.46059 | 1.862512 |
| 27 | H | 2.777575 | 3.781472 | -1.0853  | 55 | H | 6.449616 | -5.41346 | 0.138717 |
| 28 | C | 0.757976 | 5.98455  | 0.581057 | 56 | H | 2.982587 | 0.405301 | 0.263677 |

**Table S6** Gas phase optimized coordinates of  $Q_{p-NN}$  at the B3LYP level of the theory

| Sl | Sym. | X        | Y        | Z        | Sl | Sym. | X        | Y        | Z        |
|----|------|----------|----------|----------|----|------|----------|----------|----------|
| 1  | C    | 1.694906 | -2.01582 | 0.322641 | 29 | C    | 0.075568 | -6.0418  | 0.896906 |
| 2  | C    | 1.210776 | -2.23476 | -1.02901 | 30 | H    | 1.71984  | -4.86261 | 0.163128 |
| 3  | C    | 1.705504 | -1.30314 | -2.09139 | 31 | C    | -1.30768 | -6.25688 | 0.914722 |
| 4  | C    | 2.463772 | -0.21087 | -1.75503 | 32 | H    | -3.18875 | -5.54676 | 0.131895 |
| 5  | C    | 2.855578 | 0.053625 | -0.39889 | 33 | H    | 0.726713 | -6.70979 | 1.456766 |
| 6  | C    | 2.461709 | -0.94099 | 0.630176 | 34 | C    | 3.988446 | 2.147752 | -0.6472  |
| 7  | H    | 1.373567 | -2.68406 | 1.111001 | 35 | C    | 5.29581  | 2.629001 | -0.44237 |
| 8  | H    | 2.831238 | 0.449902 | -2.53381 | 36 | C    | 3.13736  | 2.880687 | -1.49491 |
| 9  | O    | 2.881129 | -0.67993 | 1.875294 | 37 | C    | 5.746246 | 3.766237 | -1.1016  |
| 10 | N    | 1.320874 | -1.48513 | -3.4044  | 38 | H    | 5.947366 | 2.084541 | 0.234773 |
| 11 | H    | 1.458783 | -0.663   | -3.97935 | 39 | C    | 3.595297 | 4.033771 | -2.1313  |
| 12 | C    | 1.214716 | -2.68504 | -4.15592 | 40 | H    | 2.105344 | 2.566977 | -1.6191  |
| 13 | C    | 0.384679 | -2.68695 | -5.28146 | 41 | C    | 4.906972 | 4.492995 | -1.96172 |
| 14 | C    | 1.976787 | -3.82706 | -3.87432 | 42 | H    | 6.766152 | 4.107317 | -0.93642 |
| 15 | C    | 0.307594 | -3.81361 | -6.09995 | 43 | H    | 2.913453 | 4.591792 | -2.76948 |
| 16 | H    | -0.20989 | -1.80528 | -5.50827 | 44 | C    | 5.40749  | 5.728298 | -2.67268 |
| 17 | C    | 1.875388 | -4.95051 | -4.68785 | 45 | H    | 5.903152 | 6.418522 | -1.97936 |
| 18 | H    | 2.651522 | -3.83053 | -3.02464 | 46 | H    | 6.14064  | 5.473961 | -3.44971 |
| 19 | C    | 1.040186 | -4.97098 | -5.81549 | 47 | H    | 4.589007 | 6.270432 | -3.15707 |
| 20 | H    | -0.34394 | -3.79162 | -6.97059 | 48 | C    | 0.926336 | -6.20704 | -6.67702 |
| 21 | H    | 2.472721 | -5.82814 | -4.45013 | 49 | H    | 1.900781 | -6.68794 | -6.82181 |
| 22 | N    | 3.583228 | 1.024406 | 0.080335 | 50 | H    | 0.263595 | -6.9543  | -6.21994 |
| 23 | N    | 0.327933 | -3.1107  | -1.39841 | 51 | H    | 0.518256 | -5.97038 | -7.66532 |
| 24 | C    | -0.17095 | -4.11981 | -0.57426 | 52 | C    | -1.91961 | -7.37492 | 1.725623 |
| 25 | C    | -1.55895 | -4.36152 | -0.59562 | 53 | H    | -1.16321 | -8.10126 | 2.040475 |
| 26 | C    | 0.641533 | -4.99039 | 0.177308 | 54 | H    | -2.40512 | -6.99231 | 2.633682 |
| 27 | C    | -2.11162 | -5.39366 | 0.152349 | 55 | H    | -2.68616 | -7.91325 | 1.155555 |
| 28 | H    | -2.18596 | -3.71603 | -1.20318 | 56 | H    | 3.400434 | 0.158336 | 1.777414 |

**Table S7** Gas phase optimized coordinates of  $Q_{o-NO}$  at the B3LYP level of the theory

| Sl | Sym | X        | Y        | Z        | Sl | Sym | X        | Y        | Z        |
|----|-----|----------|----------|----------|----|-----|----------|----------|----------|
| 1  | C   | 2.165682 | -1.59282 | -0.29978 | 29 | C   | 3.017573 | -5.90338 | 0.526665 |
| 2  | C   | 1.185822 | -2.12649 | -1.10005 | 30 | H   | 3.32817  | -4.03169 | -0.48244 |
| 3  | C   | 0.485069 | -1.25527 | -2.06223 | 31 | C   | 2.113735 | -6.88555 | 0.950728 |
| 4  | C   | 0.780069 | 0.064307 | -2.11196 | 32 | H   | 0.024933 | -7.42198 | 0.982261 |
| 5  | C   | 1.789193 | 0.712648 | -1.27802 | 33 | H   | 4.081513 | -6.04651 | 0.70139  |
| 6  | C   | 2.52944  | -0.19295 | -0.30123 | 34 | C   | 2.713199 | 3.018675 | -1.07454 |
| 7  | H   | 2.669853 | -2.19252 | 0.446593 | 35 | C   | 2.48497  | 4.233801 | -1.76964 |
| 8  | H   | 0.274418 | 0.715188 | -2.81916 | 36 | C   | 3.683365 | 3.027733 | -0.0428  |
| 9  | O   | 3.387545 | 0.228363 | 0.48649  | 37 | C   | 3.186469 | 5.390284 | -1.46533 |
| 10 | N   | -0.55064 | -1.83231 | -2.84947 | 38 | H   | 1.740482 | 4.2232   | -2.55946 |
| 11 | H   | -1.33344 | -1.20086 | -2.97769 | 39 | C   | 4.374457 | 4.197748 | 0.253288 |
| 12 | C   | -0.27371 | -2.58735 | -4.02399 | 40 | H   | 3.874842 | 2.113798 | 0.500771 |
| 13 | C   | -1.3518  | -3.02353 | -4.8103  | 41 | C   | 4.146556 | 5.395827 | -0.44076 |
| 14 | C   | 1.025764 | -2.93443 | -4.41066 | 42 | H   | 2.991688 | 6.303023 | -2.02396 |
| 15 | C   | -1.12854 | -3.78414 | -5.95334 | 43 | H   | 5.117403 | 4.180716 | 1.048115 |
| 16 | H   | -2.36742 | -2.76172 | -4.52024 | 44 | C   | 4.889549 | 6.658246 | -0.07855 |
| 17 | C   | 1.230211 | -3.71255 | -5.55146 | 45 | H   | 4.998867 | 7.322495 | -0.9426  |
| 18 | H   | 1.876759 | -2.58579 | -3.83497 | 46 | H   | 4.354173 | 7.221699 | 0.69824  |
| 19 | C   | 0.166715 | -4.15399 | -6.34552 | 47 | H   | 5.888357 | 6.437853 | 0.313048 |
| 20 | H   | -1.98059 | -4.10094 | -6.55113 | 48 | C   | 0.397261 | -5.01052 | -7.56909 |
| 21 | H   | 2.249015 | -3.9683  | -5.83396 | 49 | H   | 1.435275 | -4.94551 | -7.9117  |
| 22 | N   | 1.914373 | 1.984274 | -1.53199 | 50 | H   | 0.186315 | -6.06924 | -7.36591 |
| 23 | N   | 0.737729 | -3.42236 | -1.07248 | 51 | H   | -0.24979 | -4.70789 | -8.40065 |
| 24 | C   | 1.230348 | -4.53944 | -0.37362 | 52 | C   | 2.582542 | -8.11647 | 1.690466 |
| 25 | C   | 0.315291 | -5.52304 | 0.033986 | 53 | H   | 3.612074 | -8.37702 | 1.422292 |
| 26 | C   | 2.596147 | -4.74926 | -0.1313  | 54 | H   | 2.559306 | -7.96354 | 2.778083 |
| 27 | C   | 0.754847 | -6.67492 | 0.678715 | 55 | H   | 1.947718 | -8.98232 | 1.47231  |
| 28 | H   | -0.74593 | -5.37744 | -0.15495 | 56 | H   | -0.14173 | -3.5532  | -1.55972 |

**Table S8** Gas phase optimized coordinates of  $Q_{o-NN}$  at the B3LYP level of the theory

| Sl | Sym. | X        | Y        | Z        | Sl | Sym. | X        | Y        | Z        |
|----|------|----------|----------|----------|----|------|----------|----------|----------|
| 1  | C    | -0.37949 | -1.42511 | -0.8421  | 29 | H    | -0.11303 | 6.213328 | 2.263765 |
| 2  | C    | 0.943507 | -1.275   | -0.58082 | 30 | H    | -1.48683 | 5.59203  | -1.75692 |
| 3  | C    | 1.52666  | 0.007036 | -0.21564 | 31 | C    | 3.746994 | -0.78228 | 0.028513 |
| 4  | C    | 0.585653 | 1.185956 | -0.1358  | 32 | C    | 3.646917 | -1.88724 | 0.896672 |
| 5  | C    | -0.82379 | 0.926334 | -0.3679  | 33 | C    | 4.932335 | -0.63518 | -0.7204  |
| 6  | C    | -1.32061 | -0.30977 | -0.66469 | 34 | C    | 4.685476 | -2.81377 | 0.989097 |
| 7  | H    | 1.61886  | -2.11107 | -0.73923 | 35 | H    | 2.766818 | -1.99201 | 1.52478  |
| 8  | H    | -1.5151  | 1.749853 | -0.22314 | 36 | C    | 5.944713 | -1.58319 | -0.64093 |
| 9  | O    | -0.9267  | -2.57141 | -1.31946 | 37 | H    | 5.028401 | 0.230316 | -1.36901 |

|    |   |          |          |          |    |   |          |          |          |
|----|---|----------|----------|----------|----|---|----------|----------|----------|
| 10 | C | -3.50231 | -1.52058 | -0.39209 | 38 | C | 5.847427 | -2.69029 | 0.218714 |
| 11 | C | -4.76308 | -1.72217 | -0.97085 | 39 | H | 4.589252 | -3.65004 | 1.678799 |
| 12 | C | -3.1346  | -2.29922 | 0.712586 | 40 | H | 6.840153 | -1.45532 | -1.24605 |
| 13 | C | -5.62889 | -2.6841  | -0.45806 | 41 | N | 1.084349 | 2.325097 | 0.233914 |
| 14 | H | -5.05793 | -1.12416 | -1.83    | 42 | N | 2.790647 | 0.229389 | -0.04336 |
| 15 | C | -4.00347 | -3.2731  | 1.200737 | 43 | H | -3.16814 | 0.355753 | -1.13442 |
| 16 | H | -2.18053 | -2.13024 | 1.201695 | 44 | C | -6.19064 | -4.56044 | 1.156753 |
| 17 | C | -5.26469 | -3.48849 | 0.630552 | 45 | H | -6.01646 | -4.75339 | 2.220939 |
| 18 | H | -6.60456 | -2.81729 | -0.92026 | 46 | H | -7.24228 | -4.27891 | 1.033711 |
| 19 | H | -3.69873 | -3.86542 | 2.06092  | 47 | H | -6.0465  | -5.51205 | 0.626845 |
| 20 | N | -2.67406 | -0.50267 | -0.92357 | 48 | C | -1.56151 | 7.423693 | 0.282693 |
| 21 | C | 0.368667 | 3.520222 | 0.223386 | 49 | H | -0.81865 | 8.232274 | 0.301172 |
| 22 | C | 0.459297 | 4.361947 | 1.351117 | 50 | H | -2.19134 | 7.57642  | -0.59988 |
| 23 | C | -0.34394 | 3.991929 | -0.89692 | 51 | H | -2.19293 | 7.550201 | 1.170851 |
| 24 | C | -0.18301 | 5.593355 | 1.372087 | 52 | C | 6.975536 | -3.68925 | 0.328839 |
| 25 | H | 1.033329 | 4.017534 | 2.206026 | 53 | H | 7.840019 | -3.26385 | 0.856131 |
| 26 | C | -0.95641 | 5.244666 | -0.87249 | 54 | H | 6.664852 | -4.58395 | 0.87848  |
| 27 | H | -0.37947 | 3.38622  | -1.79794 | 55 | H | 7.329334 | -4.00814 | -0.65912 |
| 28 | C | -0.9013  | 6.06492  | 0.26026  | 56 | H | -0.22427 | -3.23485 | -1.42136 |

**Table S9** Gas phase optimized coordinates of **1** at the B3LYP level of the theory

| Sl | Sym | X        | Y        | Z        | Sl | Sym | X        | Y        | Z        |
|----|-----|----------|----------|----------|----|-----|----------|----------|----------|
| 1  | Pd  | 2.015654 | 1.573266 | -0.07989 | 31 | H   | 6.227163 | -1.817   | -1.74845 |
| 2  | Cl  | 1.619099 | 3.860421 | -0.08906 | 32 | C   | 4.320283 | -1.16011 | -1.01648 |
| 3  | Cl  | 4.305691 | 1.970573 | 0.00591  | 33 | H   | 4.106917 | -0.53925 | -1.88372 |
| 4  | N   | 2.168099 | -0.50212 | -0.06589 | 34 | N   | -2.79056 | -2.98382 | -0.15851 |
| 5  | C   | 1.012398 | -1.12912 | -0.07182 | 35 | H   | -2.68735 | -3.97946 | -0.3311  |
| 6  | C   | 0.845997 | -2.55976 | -0.11254 | 36 | C   | -4.1206  | -2.50687 | -0.08348 |
| 7  | H   | 1.729538 | -3.19375 | -0.14793 | 37 | C   | -4.50517 | -1.46429 | 0.772674 |
| 8  | C   | -0.39799 | -3.10291 | -0.13656 | 38 | H   | -3.77212 | -0.97498 | 1.410096 |
| 9  | C   | -1.61572 | -2.28178 | -0.11744 | 39 | C   | -5.84323 | -1.07543 | 0.836654 |
| 10 | C   | -1.48935 | -0.91025 | -0.1013  | 40 | H   | -6.12199 | -0.26392 | 1.510618 |
| 11 | H   | -2.36802 | -0.27836 | -0.15225 | 41 | C   | -6.83504 | -1.70958 | 0.07374  |
| 12 | C   | -0.20399 | -0.28275 | -0.08083 | 42 | C   | -6.43733 | -2.76548 | -0.75947 |
| 13 | N   | 0.011014 | 1.02119  | -0.10087 | 43 | H   | -7.18313 | -3.28766 | -1.36062 |
| 14 | C   | -1.07975 | 1.933187 | -0.02318 | 44 | C   | -5.10209 | -3.15695 | -0.84664 |
| 15 | C   | -1.83665 | 2.03832  | 1.150637 | 45 | H   | -4.81505 | -3.97056 | -1.51474 |
| 16 | H   | -1.58216 | 1.421487 | 2.012733 | 46 | C   | 7.152231 | -3.35591 | 0.317507 |
| 17 | C   | -2.88194 | 2.960502 | 1.225354 | 47 | H   | 7.136888 | -4.11296 | 1.113588 |
| 18 | H   | -3.45115 | 3.046345 | 2.152552 | 48 | H   | 7.966463 | -2.65046 | 0.547711 |
| 19 | C   | -3.20194 | 3.786287 | 0.1385   | 49 | H   | 7.415139 | -3.85776 | -0.62509 |
| 20 | C   | -2.4306  | 3.666568 | -1.02847 | 50 | O   | -0.63632 | -4.44313 | -0.20644 |
| 21 | H   | -2.64833 | 4.307449 | -1.88437 | 51 | H   | 0.199472 | -4.94093 | -0.25243 |
| 22 | C   | -1.36876 | 2.768156 | -1.10948 | 52 | C   | -8.2754  | -1.25699 | 0.134402 |

|    |   |          |          |          |    |   |          |          |          |
|----|---|----------|----------|----------|----|---|----------|----------|----------|
| 23 | H | -0.75153 | 2.714284 | -2.00391 | 53 | H | -8.5481  | -0.91712 | 1.143504 |
| 24 | C | 3.388359 | -1.23072 | 0.026945 | 54 | H | -8.96329 | -2.06551 | -0.14874 |
| 25 | C | 3.684666 | -1.98245 | 1.171609 | 55 | H | -8.45682 | -0.41523 | -0.55325 |
| 26 | H | 2.981999 | -1.99769 | 2.004939 | 56 | C | -4.31352 | 4.806215 | 0.230429 |
| 27 | C | 4.895339 | -2.67213 | 1.257726 | 57 | H | -3.90815 | 5.820571 | 0.373502 |
| 28 | H | 5.121951 | -3.23881 | 2.162234 | 58 | H | -4.98306 | 4.596507 | 1.076024 |
| 29 | C | 5.827828 | -2.63605 | 0.211284 | 59 | H | -4.91989 | 4.8257   | -0.68701 |
| 30 | C | 5.512611 | -1.87466 | -0.92593 |    |   |          |          |          |

**Table S10** Gas phase optimized coordinates of  $2^{Me}$  ( $PMe_3$  analogue of **2**) at the B3LYP level of the theory

| Sl. | Sym | X        | Y        | Z        |
|-----|-----|----------|----------|----------|
| 1   | Rh  | 5.814491 | 12.21223 | 0.460595 |
| 2   | Cl  | 6.252325 | 9.865728 | 0.065408 |
| 3   | Cl  | 6.607004 | 12.80093 | -1.69613 |
| 4   | Cl  | 5.504023 | 14.53432 | 1.071138 |
| 5   | N   | 5.251642 | 11.71227 | 2.357598 |
| 6   | C   | 5.099429 | 11.44491 | 3.470323 |
| 7   | C   | 4.945387 | 11.11271 | 4.88058  |
| 8   | H   | 4.492964 | 10.12182 | 4.988979 |
| 9   | H   | 4.311284 | 11.85465 | 5.376365 |
| 10  | H   | 5.931587 | 11.11002 | 5.356804 |
| 11  | N   | 7.953898 | 12.43262 | 1.05262  |
| 12  | H   | 8.385173 | 11.79391 | 0.384833 |
| 13  | H   | 8.12197  | 13.38854 | 0.739763 |
| 14  | C   | 8.392082 | 12.2057  | 2.396265 |
| 15  | C   | 8.769212 | 10.92148 | 2.806054 |
| 16  | H   | 8.73343  | 10.09822 | 2.097438 |
| 17  | C   | 9.166076 | 10.7016  | 4.126624 |
| 18  | H   | 9.465835 | 9.699294 | 4.426303 |
| 19  | C   | 9.19428  | 11.74289 | 5.06776  |
| 20  | C   | 8.792497 | 13.01803 | 4.640227 |
| 21  | H   | 8.797348 | 13.84659 | 5.345726 |
| 22  | C   | 8.392875 | 13.25447 | 3.323207 |
| 23  | H   | 8.065559 | 14.24442 | 3.016479 |
| 24  | P   | 3.697631 | 12.0764  | -0.47065 |
| 25  | C   | 9.684025 | 11.50884 | 6.47969  |
| 26  | H   | 10.77143 | 11.64897 | 6.550105 |
| 27  | H   | 9.22202  | 12.20653 | 7.187569 |
| 28  | H   | 9.46771  | 10.48907 | 6.818579 |
| 29  | C   | 3.547994 | 10.82931 | -1.80709 |
| 30  | H   | 2.534735 | 10.85024 | -2.22571 |
| 31  | H   | 4.278854 | 11.06133 | -2.58629 |
| 32  | H   | 3.775521 | 9.836433 | -1.41275 |
| 33  | C   | 3.117218 | 13.64127 | -1.23066 |

|    |   |          |          |          |
|----|---|----------|----------|----------|
| 34 | H | 2.130012 | 13.49162 | -1.68389 |
| 35 | H | 3.071891 | 14.42547 | -0.47166 |
| 36 | H | 3.837233 | 13.94782 | -1.99397 |
| 37 | C | 2.381481 | 11.62959 | 0.735269 |
| 38 | H | 2.344696 | 12.38094 | 1.529736 |
| 39 | H | 1.405912 | 11.58416 | 0.237306 |
| 40 | H | 2.604519 | 10.6541  | 1.177722 |

**Table S11** Gas phase optimized coordinates of  $[(Q_{o-NN})ZnCl_2]$  at the B3LYP level of the theory

| Sl | Sym | X        | Y        | Z        | Sl | Sym | X        | Y        | Z        |
|----|-----|----------|----------|----------|----|-----|----------|----------|----------|
| 1  | C   | -0.70698 | -1.28748 | -0.7325  | 31 | C   | 3.410152 | -1.62719 | 0.441807 |
| 2  | C   | 0.596138 | -1.45099 | -0.38189 | 32 | C   | 2.946953 | -2.69181 | 1.232928 |
| 3  | C   | 1.434457 | -0.33821 | -0.0099  | 33 | C   | 4.681615 | -1.71839 | -0.15345 |
| 4  | C   | 0.814086 | 1.035731 | -0.03801 | 34 | C   | 3.732314 | -3.83151 | 1.396604 |
| 5  | C   | -0.5767  | 1.130422 | -0.3803  | 35 | H   | 2.002026 | -2.60183 | 1.760167 |
| 6  | C   | -1.34516 | 0.040051 | -0.70122 | 36 | C   | 5.438884 | -2.87301 | 0.001565 |
| 7  | H   | 1.055053 | -2.43107 | -0.46187 | 37 | H   | 5.050437 | -0.88348 | -0.74334 |
| 8  | H   | -1.0283  | 2.115079 | -0.40475 | 38 | C   | 4.983951 | -3.95045 | 0.779587 |
| 9  | O   | -1.47722 | -2.28828 | -1.20822 | 39 | H   | 3.3698   | -4.63779 | 2.029867 |
| 10 | C   | -3.77126 | -0.6092  | -0.84228 | 40 | H   | 6.412298 | -2.93327 | -0.47923 |
| 11 | C   | -4.86219 | -0.58516 | -1.71972 | 41 | N   | 1.600559 | 2.041905 | 0.244529 |
| 12 | C   | -3.85571 | -1.36513 | 0.332583 | 42 | N   | 2.69996  | -0.419   | 0.290956 |
| 13 | C   | -6.01202 | -1.31342 | -1.42656 | 43 | H   | -2.86687 | 1.1423   | -1.42205 |
| 14 | H   | -4.80205 | -0.00074 | -2.63441 | 44 | C   | -7.33927 | -2.9156  | 0.024676 |
| 15 | C   | -5.00446 | -2.10578 | 0.601498 | 45 | H   | -7.45081 | -3.10347 | 1.097652 |
| 16 | H   | -3.03483 | -1.35808 | 1.04328  | 46 | H   | -8.24669 | -2.41238 | -0.32635 |
| 17 | C   | -6.10371 | -2.09702 | -0.26758 | 47 | H   | -7.29744 | -3.89301 | -0.47473 |
| 18 | H   | -6.85109 | -1.27802 | -2.11736 | 48 | C   | 0.188553 | 7.583309 | 0.787373 |
| 19 | H   | -5.05439 | -2.68613 | 1.519826 | 49 | H   | 0.965938 | 8.108452 | 1.357019 |
| 20 | N   | -2.63993 | 0.1932   | -1.14912 | 50 | H   | 0.113075 | 8.081887 | -0.18651 |
| 21 | C   | 1.179325 | 3.382143 | 0.358754 | 51 | H   | -0.76054 | 7.725158 | 1.313787 |
| 22 | C   | 0.083047 | 3.776652 | 1.143898 | 52 | C   | 5.839107 | -5.18    | 0.970342 |
| 23 | C   | 1.965448 | 4.369905 | -0.26275 | 53 | H   | 6.721084 | -4.95711 | 1.584517 |
| 24 | C   | -0.23005 | 5.128391 | 1.275933 | 54 | H   | 5.284145 | -5.98189 | 1.467377 |
| 25 | H   | -0.48491 | 3.031192 | 1.691944 | 55 | H   | 6.205475 | -5.56539 | 0.0114   |
| 26 | C   | 1.622748 | 5.710802 | -0.13899 | 56 | Cl  | 4.970813 | 2.025991 | -1.1363  |
| 27 | H   | 2.829997 | 4.067176 | -0.84759 | 57 | Cl  | 4.097875 | 1.728052 | 2.867143 |
| 28 | C   | 0.522259 | 6.118861 | 0.632503 | 58 | Zn  | 3.665349 | 1.505769 | 0.659519 |
| 29 | H   | -1.06831 | 5.418133 | 1.905124 | 59 | H   | -0.94982 | -3.10307 | -1.26407 |
| 30 | H   | 2.232801 | 6.459134 | -0.63928 |    |     |          |          |          |

**Table S12** Gas phase optimized coordinates of  $[(Q_{o-NO})ZnCl_2]^-$  at the B3LYP level of the theory

| Sl | Sym | X        | Y        | Z        | Sl | Sym | X        | Y        | Z        |
|----|-----|----------|----------|----------|----|-----|----------|----------|----------|
| 1  | C   | -0.67718 | -2.40269 | -1.37747 | 30 | H   | 1.393389 | 5.927485 | 0.06786  |
| 2  | C   | 0.408211 | -1.85654 | -0.70742 | 31 | C   | 2.607534 | -0.51407 | 0.782387 |
| 3  | C   | 0.610065 | -0.45576 | -0.52301 | 32 | C   | 2.993399 | -0.12624 | 2.083238 |
| 4  | C   | -0.39742 | 0.467427 | -1.14129 | 33 | C   | 3.4335   | -1.44176 | 0.110573 |
| 5  | C   | -1.46002 | -0.03505 | -1.84006 | 34 | C   | 4.116311 | -0.67256 | 2.694436 |
| 6  | C   | -1.65945 | -1.44777 | -2.018   | 35 | C   | 4.570096 | -1.96171 | 0.725582 |
| 7  | H   | 1.093021 | -2.54893 | -0.23418 | 36 | H   | 3.189703 | -1.73135 | -0.90681 |
| 8  | H   | -2.18592 | 0.646176 | -2.27307 | 37 | C   | 4.92986  | -1.60397 | 2.031592 |
| 9  | O   | -0.89445 | -3.6603  | -1.48608 | 38 | H   | 4.376849 | -0.36052 | 3.704803 |
| 10 | C   | -3.61864 | -1.29397 | -3.39516 | 39 | H   | 5.191232 | -2.66691 | 0.175528 |
| 11 | C   | -3.29416 | -0.35393 | -4.386   | 40 | N   | -0.3452  | 1.835336 | -0.9118  |
| 12 | C   | -4.9715  | -1.61064 | -3.1792  | 41 | N   | 1.524046 | 0.136915 | 0.206043 |
| 13 | C   | -4.30276 | 0.274442 | -5.11704 | 42 | C   | -6.7462  | 0.686656 | -5.66755 |
| 14 | H   | -2.2509  | -0.14719 | -4.60478 | 43 | H   | -7.30287 | 1.397838 | -5.0415  |
| 15 | C   | -5.96453 | -0.96372 | -3.9073  | 44 | H   | -6.3369  | 1.246491 | -6.5156  |
| 16 | H   | -5.21897 | -2.37058 | -2.44286 | 45 | H   | -7.47635 | -0.03083 | -6.06187 |
| 17 | C   | -5.65381 | -0.0074  | -4.88652 | 46 | C   | 3.889693 | 5.73194  | -1.06283 |
| 18 | H   | -4.02956 | 0.989696 | -5.89062 | 47 | H   | 4.331845 | 5.819438 | -2.06325 |
| 19 | H   | -7.00581 | -1.21955 | -3.72091 | 48 | H   | 3.521791 | 6.722487 | -0.77299 |
| 20 | N   | -2.64007 | -2.00905 | -2.67423 | 49 | H   | 4.705919 | 5.471805 | -0.37476 |
| 21 | C   | 0.742027 | 2.734315 | -0.92996 | 50 | C   | 6.137265 | -2.21138 | 2.707802 |
| 22 | C   | 1.954114 | 2.474034 | -1.58933 | 51 | H   | 6.892835 | -2.52149 | 1.976702 |
| 23 | C   | 0.558845 | 3.992695 | -0.34246 | 52 | H   | 6.610237 | -1.50396 | 3.39964  |
| 24 | C   | 2.951706 | 3.440828 | -1.62389 | 53 | H   | 5.87021  | -3.10315 | 3.292966 |
| 25 | H   | 2.109885 | 1.515177 | -2.06911 | 54 | Zn  | -2.5735  | -4.1974  | -2.50319 |
| 26 | C   | 1.56371  | 4.959025 | -0.39857 | 55 | Cl  | -4.3769  | -4.81589 | -1.1983  |
| 27 | H   | -0.37532 | 4.208546 | 0.171591 | 56 | Cl  | -2.16681 | -5.20363 | -4.52373 |
| 28 | C   | 2.783722 | 4.702446 | -1.03028 | 57 | H   | -1.23541 | 2.291337 | -1.06709 |
| 29 | H   | 3.884161 | 3.212794 | -2.13679 | 58 | H   | 2.384182 | 0.612114 | 2.596518 |

**Table S13** Excitation energies ( $\lambda/\text{nm}$ ), oscillator strengths ( $f$ ) and dominant contributions of UV-Vis/NIR absorption bands of  $Q_{p\text{-NO}}$  obtained from the TD DFT calculations

| $\lambda_{\text{cal}}$<br>(nm) | $f$    | $\lambda_{\text{exp}}$<br>(nm) | Significant transition                                 | Percentage (>10%) |
|--------------------------------|--------|--------------------------------|--------------------------------------------------------|-------------------|
| 605                            | 0.1475 | 544                            | HOMO $\rightarrow$ LUMO                                | 82.35             |
| 475                            | 0.2980 |                                | HOMO-2 $\rightarrow$ LUMO<br>HOMO-1 $\rightarrow$ LUMO | 25.62<br>59.67    |
| 459                            | 0.2268 | -                              | HOMO-2 $\rightarrow$ LUMO<br>HOMO-1 $\rightarrow$ LUMO | 59.06<br>23.27    |
| 394                            | 0.0758 | 392                            | HOMO-7 $\rightarrow$ LUMO<br>HOMO-3 $\rightarrow$ LUMO | 16.61<br>58.59    |

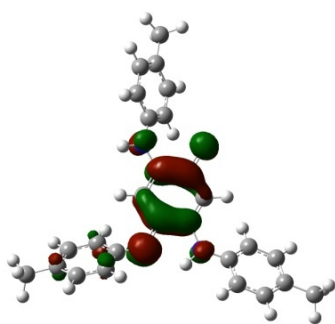

LUMO

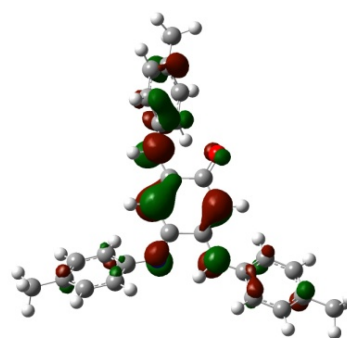

HOMO

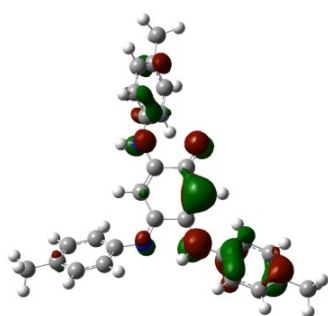

HOMO-1

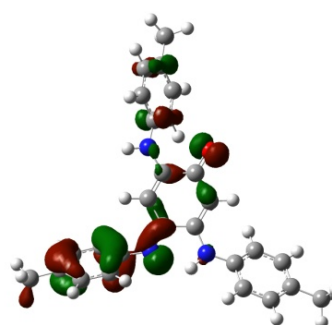

HOMO-2



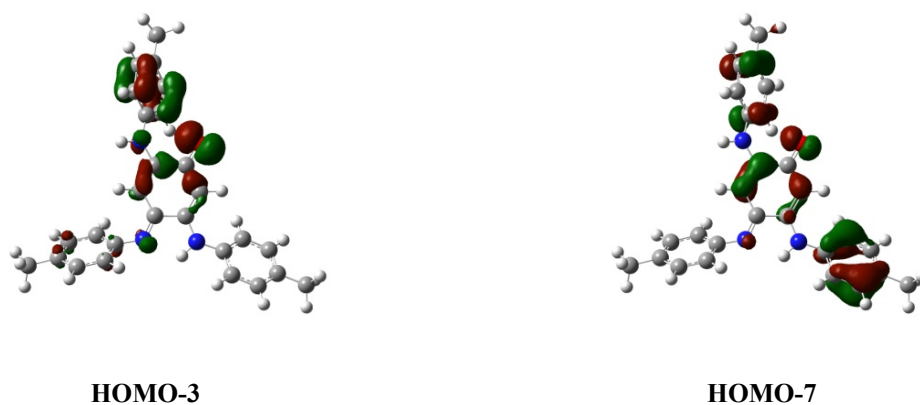

**Fig. S3** Photo active molecular orbitals of  $Q_p\text{-NO}$  (isosurface value, 0.04).

**Table S14** Excitation energies ( $\lambda/\text{nm}$ ), oscillator strengths ( $f$ ), transition types and dominant contributions of UV-Vis/NIR absorption bands of **1** obtained from the TD DFT calculations

| $\lambda_{\text{cal}}$<br>(nm)                                                                  | $f$    | $\lambda_{\text{exp}}$<br>(nm) | Significant transition    | Percentage (>10%) | Transition types |
|-------------------------------------------------------------------------------------------------|--------|--------------------------------|---------------------------|-------------------|------------------|
| 609                                                                                             | 0.1383 | 671                            | HOMO-4 $\rightarrow$ LUMO | 10.20             | MLCT             |
|                                                                                                 |        |                                | HOMO-3 $\rightarrow$ LUMO | 38.14             | MLCT             |
|                                                                                                 |        |                                | HOMO-2 $\rightarrow$ LUMO | 23.89             | MLCT             |
| 579                                                                                             | 0.1026 | 617                            | HOMO-4 $\rightarrow$ LUMO | 61.39             | MLCT             |
|                                                                                                 |        |                                | HOMO-6 $\rightarrow$ LUMO | 40.11             | MMLLCT           |
| 522                                                                                             | 0.0928 | 452                            | HOMO $\rightarrow$ LUMO+1 | 31.78             | d-d              |
| MLCT = Metal to ligand charge transfer<br>MMLLCT = Mixed metal ligand to ligand charge transfer |        |                                |                           |                   |                  |

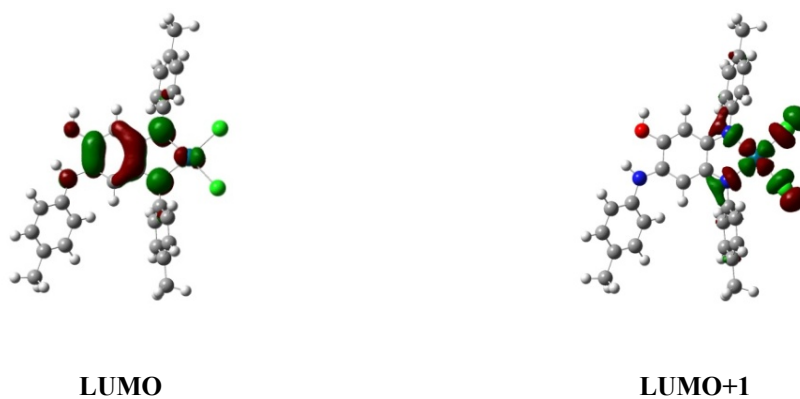

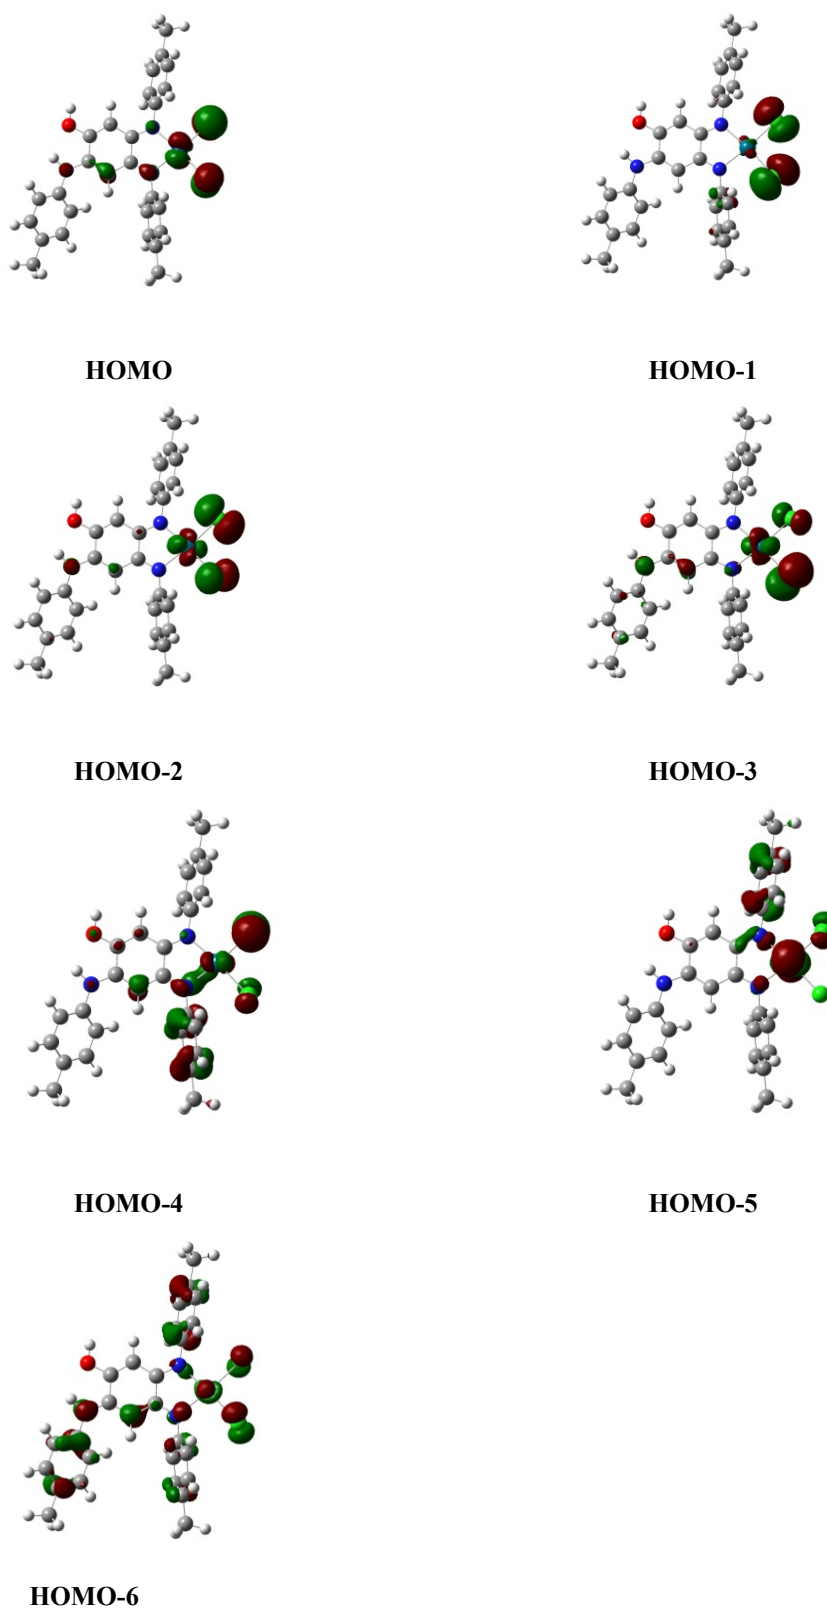

Fig. S4 Photo active molecular orbitals of **1** (isosurface value, 0.04).

## References

- 1 ShelXS97, G. M. Sheldrick, Universität Göttingen: Germany, 1997.
- 2 ShelXL97, G. M. Sheldrick, Universität Göttingen: Germany, 1997.
- 3 M. J. Frisch, G. W. Trucks, H. B. Schlegel, G. E. Scuseria, M. A. Robb, J. R. Cheeseman, Jr., J. A. Montgomery, T. Vreven, K. N. Kudin, J. C. Burant, J. M. Millam, S. S. Iyengar, J. Tomasi, V. Barone, B. Mennucci, M. Cossi, G. Scalmani, N. Rega, G. A. Petersson, H. Nakatsuji, M. Hada, M. Ehara, K. Toyota, R. Fukuda, J. Hasegawa, M. Ishida, T. Nakajima, Y. Honda, O. Kitao, H. Nakai, M. Klene, X. Li, J. E. Knox, H. P. Hratchian, J. B. Cross, R. Ammi, C. Pomelli, J. W. Ochterski, P. Y. Ayala, K. Morokuma, G. A. Voth, P. Salvador, J. J. Dannenberg, V. G. Zakrzewski, S. Dapprich, A. D. Daniels, M. C. Strain, O. Farkas, D. K. Malick, A. D. Rabuck, K. Raghavachari, J. B. Foresman, J. V. Ortiz, Q. Cui, A. G. Baboul, S. Clifford, J. Cioslowski, B. B. Stefanov, G. Liu, A. Liashenko, P. Piskorz, I. Komaromi, R. L. Martin, D. J. Fox, T. Keith, M. A. Al-Laham, C. Y. Peng, A. Nanayakkara, M. Challacombe, P. M. W. Gill, B. Johnson, W. Chen, M. W. Wong, C. Gonzalez and J. A. Pople, Gaussian 03, revision E.01; Gaussian, Inc.: Wallingford, CT 06492, 2005.
- 4 (a) D. R. Salahub and M. C. Zerner, *The Challenge of d and f Electrons*, ACS, Washington, D.C., 1989; (b) R. G. Parr and W. Yang, *Density Functional Theory of atoms and molecules*; Oxford University Press, Oxford, U.K., 1989; (c) W. Kohn and L. Sham, *J. Phys. Rev.*, 1965, **140**, A1133; (d) P. Hohenberg and W. Kohn, *Phys Rev.*, 1964, **136**, B864.
- 5 (a) R. E. Stratmann, G. E. Scuseria and M. Frisch, *J. Chem. Phys.*, 1998, **109**, 8218; (b) M. E. Casida, C. Jamoroski, K. C. Casida and D. R. Salahub, *J. Chem. Phys.*, 1998, **108**, 4439; (c) R. Bauernschmitt and R. Ahlrichs, *Chem. Phys.Lett.*, 1996, **256**, 454.
- 6 (a) A. D. Becke, *J. Chem. Phys.*, 1993, **98**, 5648; (b) B. Miehlich, A. Savin, H. Stoll, H. Preuss, *Chem. Phys. Lett.*, 1989, **157**, 200; (c) C. Lee, W. Yang, R. G. Parr, *Phys. Rev.*, 1988, **B 37**, 785.
- 7 P. J. Pulay, *Comp. Chem.*, 1982, **3**, 556.
- 8 H. B. Schlegel and J. J. McDouall, in *Computational Advances in Organic Chemistry*, ed. C. Ogretir and I. G. Csizmadia, Kluwer Academic, The Netherlands, 1991, p 167.
- 9 P. J. Hay and W. R. Wadt, *J. Chem. Phys.*, 1985, **82**, 270.
- 10 W. R. Wadt and P. J. Hay, *J. Chem. Phys.*, 1985, **82**, 284.
- 11 P. J. Hay and W. R. Wadt, *J. Chem. Phys.*, 1985, **82**, 299.
- 12 (a) V. A. Rassolov, M. A. Ratner, J. A. Pople, P. C. Redfern and L. A. Curtiss, *J. Comp. Chem.*, 2001, **22**, 976; (b) M. M. Francl, W. J. Pietro, W. J. Hehre, J. S. Binkley, D. J. DeFrees, J. A. Pople and M. S. Gordon, *J. Chem. Phys.*, 1982, **77**, 3654; (c) P. C. Hariharan and J. A. Pople, *Mol. Phys.*, 1974, **27**, 209; (d) P. C. Hariharan and J. A. Pople, *Theo. Chim. Acta.*, 1973, **28**, 213; (e) W. J. Hehre, R. Ditchfield and J. A. Pople, *J. Chem. Phys.*, 1972, **56**, 2257.
- 13 T. Clark, J. Chandrasekhar, G. W. Spitznagel and P. V. R. Schleyer, *J. Comp. Chem.*, 1983, **4**, 294.
